# Supplementary material for: Dietary Fatty Acids and Changes in Blood Lipids during Adolescence: The Role of Substituting Nutrient Intakes
Source: PubMed Central journal article supplement (PMC5331558; doi:10.3390/nu9020127), 2017-02-11
Supplement: nutrients-09-00127-s001.pdf [file nutrients-09-00127-s001.pdf]

# Supplementary Materials: Dietary Fatty Acids and Changes in Blood Lipids during Adolescence: The Role of Substituting Nutrient Intakes

Carla Harris, Anette Buyken, Sibylle Koletzko, Andrea von Berg, Dietrich Berdel, Tamara Schikowski, Berthold Koletzko, Joachim Heinrich and Marie Standl

**Table S1.** Comparison of descriptive characteristics of participants included in analyses (data for exposure at age 10 years and outcome at age 10 years and age 15 years) and participants lost to follow-up (data only for exposure and outcome at age 10 years).

| Variables                                         | Included       | Lost to follow-up | <i>p</i> -Value |
|---------------------------------------------------|----------------|-------------------|-----------------|
| <i>N</i>                                          | 1606           | 555               |                 |
| BMI at 10 years [kg/m <sup>2</sup> ] <sup>b</sup> | 16.8 (2.2)     | 17.1 (2.5)        | 0.008           |
| Fasting at 10 years [yes] <sup>a</sup>            | 17.0           | 17.8              | 0.648           |
| screen-time at 10 years [high] <sup>a</sup>       | 10.0           | 11.5              | 0.331           |
| Energy intake at 10 years [kcal] <sup>b</sup>     | 1971.3 (548.2) | 1932.3 (570.1)    | 0.160           |
| Sex [female] <sup>a</sup>                         | 48.7           | 50.8              | 0.403           |
| <i>Study</i> <sup>a</sup>                         |                |                   |                 |
| GINI observation                                  | 30.9           | 31.7              |                 |
| GINI intervention                                 | 34.2           | 29.7              |                 |
| LISA                                              | 34.9           | 38.6              | 0.122           |
| <i>Region</i> <sup>a</sup>                        |                |                   |                 |
| Munich                                            | 57.0           | 57.7              |                 |
| Leipzig                                           | 8.9            | 7.2               |                 |
| Bad Honnef                                        | 4.7            | 5.8               |                 |
| Wesel                                             | 29.4           | 29.4              | 0.509           |
| Parental education level [high] <sup>a</sup>      | 70.9           | 66.6              | 0.065           |
| Pubertal onset 10 years [yes] <sup>a</sup>        | 71.6           | 67.6              | 0.092           |

<sup>a</sup> Presented as percentage and tested by Fisher's exact test (binary variables) or Pearson's Chi-squared test (variables with more than 2 levels); <sup>b</sup> Presented as mean (standard deviation) and tested by *t*-test.
